# Supplementary material for: stoPET v1.0: a stochastic potential evapotranspiration generator for simulation of climate change impacts
Source: Copernicus journal article supplement (doi:10.5194/gmd-16-557-2023), 2023-01-25
Supplement: Supplementary file 2 [file gmd-16-557-2023-supplement.zip]

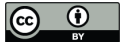

*Supplement of*

## **stoPET v1.0: a stochastic potential evapotranspiration generator for simulation of climate change impacts**

**Dagmawi Teklu Asfaw et al.**

*Correspondence to:* Dagmawi Teklu Asfaw (d.t.asfaw@bristol.ac.uk)

- gmd-16-557-2023-supplement-title-page.pdf
- SupplementaryInfo
  - stoPET\_SupplementaryInfo.pdf
  - stoPET\_UserGuide.pdf

The copyright of individual parts of the supplement might differ from the article licence.
